# Supplementary material for: Smartphone detection of atrial fibrillation using photoplethysmography: a systematic review and meta-analysis
Source: PubMed Central journal article supplement — Heart. 2022 Mar 11;108(20):1600–7. doi: 10.1136/heartjnl-2021-320417 (PMC9554073; doi:10.1136/heartjnl-2021-320417), 2022-03-11
Supplement: heartjnl-2021-320417supp001.pdf [file heartjnl-2021-320417supp001.pdf]

## **Smartphone detection of atrial fibrillation using photoplethysmography:**

### **A systematic review and meta-analysis**

Simrat K Gill, Karina V Bunting, Claudio Sartini, Victor Cardoso, Narges Ghoreishi, Hae-Won Uh, John A Williams, Kiliansa Suzart-Woischnik, Amitava Banerjee, Folkert Asselbergs, MJC Eijkemans, Georgios V Gkoutos, Dipak Kotecha.

### **Supplementary material**

|                                                                                    |    |
|------------------------------------------------------------------------------------|----|
| Table S1: Search strategy for EMBASE and MEDLINE databases                         | 2  |
| Table S2: Search strategy for Cochrane database                                    | 4  |
| Table S3: Summary of characteristics for conference abstracts                      | 5  |
| Table S4: Risk of bias and applicability concerns for full text studies            | 8  |
| Table S5: Risk of bias and applicability concerns for conference abstracts         | 9  |
| Table S6: Sensitivity and specificity of each study by smartphone PPG application  | 10 |
| Figure S1: Forest plot of the sensitivity and specificity of smartphone PPG vs ECG | 11 |
| Figure S2: Forest plot of positive/negative prediction for smartphone PPG vs ECG   | 12 |
| References                                                                         | 13 |

**Table S1: Search strategy for EMBASE and MEDLINE databases**

| Search                                                                                                                                                                                                                                                                                                                                                                                                                                                                                                                                                                                                                                                                                                                                                                                                                                                                                                                                                                                                                                                                                                                                                                                                                                                                                                                                                                                                                                                                                                                                                                                                                                                                                                                                                                                                                                                                                                                                                                                                                                                                                                                                                                                                                                                                                                                                                                                                                                                                                                                                                                                                                                                                                                                                                                                                                                                                                                                                                                                                                                                                                                                                                                                                                                                                                                                                                                                                                                                                                                                                                                                                                                                                                                                                                                                                                                                                                                                                                                                                                                                                                                                                                                                                                                                                                                                                                                                                                                                                                                                                                                                                                                                                                                                                                                                                                                                                                                                                                                                                                                                                                                                                                                                                                                                                                                                                                                                                                                                                                                                                                                                                                                                                                                                                                                                                                                                                                                                                                                                                                                                                                                                                                                                                                                                                                                                                                                                                                               | Hits |
|--------------------------------------------------------------------------------------------------------------------------------------------------------------------------------------------------------------------------------------------------------------------------------------------------------------------------------------------------------------------------------------------------------------------------------------------------------------------------------------------------------------------------------------------------------------------------------------------------------------------------------------------------------------------------------------------------------------------------------------------------------------------------------------------------------------------------------------------------------------------------------------------------------------------------------------------------------------------------------------------------------------------------------------------------------------------------------------------------------------------------------------------------------------------------------------------------------------------------------------------------------------------------------------------------------------------------------------------------------------------------------------------------------------------------------------------------------------------------------------------------------------------------------------------------------------------------------------------------------------------------------------------------------------------------------------------------------------------------------------------------------------------------------------------------------------------------------------------------------------------------------------------------------------------------------------------------------------------------------------------------------------------------------------------------------------------------------------------------------------------------------------------------------------------------------------------------------------------------------------------------------------------------------------------------------------------------------------------------------------------------------------------------------------------------------------------------------------------------------------------------------------------------------------------------------------------------------------------------------------------------------------------------------------------------------------------------------------------------------------------------------------------------------------------------------------------------------------------------------------------------------------------------------------------------------------------------------------------------------------------------------------------------------------------------------------------------------------------------------------------------------------------------------------------------------------------------------------------------------------------------------------------------------------------------------------------------------------------------------------------------------------------------------------------------------------------------------------------------------------------------------------------------------------------------------------------------------------------------------------------------------------------------------------------------------------------------------------------------------------------------------------------------------------------------------------------------------------------------------------------------------------------------------------------------------------------------------------------------------------------------------------------------------------------------------------------------------------------------------------------------------------------------------------------------------------------------------------------------------------------------------------------------------------------------------------------------------------------------------------------------------------------------------------------------------------------------------------------------------------------------------------------------------------------------------------------------------------------------------------------------------------------------------------------------------------------------------------------------------------------------------------------------------------------------------------------------------------------------------------------------------------------------------------------------------------------------------------------------------------------------------------------------------------------------------------------------------------------------------------------------------------------------------------------------------------------------------------------------------------------------------------------------------------------------------------------------------------------------------------------------------------------------------------------------------------------------------------------------------------------------------------------------------------------------------------------------------------------------------------------------------------------------------------------------------------------------------------------------------------------------------------------------------------------------------------------------------------------------------------------------------------------------------------------------------------------------------------------------------------------------------------------------------------------------------------------------------------------------------------------------------------------------------------------------------------------------------------------------------------------------------------------------------------------------------------------------------------------------------------------------------------------------------------------------------------|------|
| (('mobile application'/exp OR 'mobile app':ti,ab,de,tn,dn,kw OR 'mobile application':ti,ab,de,tn,dn,kw OR 'mobile applications':ti,ab,de,tn,dn,kw OR 'mobile apps':ti,ab,de,tn,dn,kw OR 'portable software app':ti,ab,de,tn,dn,kw OR 'portable software application':ti,ab,de,tn,dn,kw OR 'portable software applications':ti,ab,de,tn,dn,kw OR 'portable software apps':ti,ab,de,tn,dn,kw OR 'cell phone use'/exp OR 'cell phone usage':ti,ab,de,tn,dn,kw OR 'cell phone use':ti,ab,de,tn,dn,kw OR 'cell phone utilization':ti,ab,de,tn,dn,kw OR 'cellphone usage':ti,ab,de,tn,dn,kw OR 'cellphone use':ti,ab,de,tn,dn,kw OR 'cellphone utilization':ti,ab,de,tn,dn,kw OR 'mobile phone usage':ti,ab,de,tn,dn,kw OR 'mobile phone use':ti,ab,de,tn,dn,kw OR 'mobile phone utilization':ti,ab,de,tn,dn,kw OR 'mobile phone'/exp OR 'cell phone':ti,ab,de,tn,dn,kw OR 'cell phones':ti,ab,de,tn,dn,kw OR 'cellphone':ti,ab,de,tn,dn,kw OR 'cellphones':ti,ab,de,tn,dn,kw OR 'cellular phone':ti,ab,de,tn,dn,kw OR 'cellular telephone':ti,ab,de,tn,dn,kw OR 'mobile phone':ti,ab,de,tn,dn,kw OR 'mobile telephone':ti,ab,de,tn,dn,kw OR 'smartphone'/exp OR 'smart phone*':ti,ab,de,tn,dn,kw OR smartphone*':ti,ab,de,tn,dn,kw OR 'mobile app*':ti,ab,de,tn,dn,kw OR mobileapp*':ti,ab,de,tn,dn,kw OR 'portable software app*':ti,ab,de,tn,dn,kw OR 'portablessoftware app*':ti,ab,de,tn,dn,kw OR ((mobile NEAR/2 app*):ti,ab,de,tn,dn,kw) OR (('cell phone* NEAR/2 app*):ti,ab,de,tn,dn,kw) OR (('cell phone* NEAR/2 software*):ti,ab,de,tn,dn,kw) OR (('cellphone* NEAR/2 app*):ti,ab,de,tn,dn,kw) OR (('cellphone* NEAR/2 software*):ti,ab,de,tn,dn,kw) OR (('cellular phone* NEAR/2 app*):ti,ab,de,tn,dn,kw) OR (('cellular phone* NEAR/2 software*):ti,ab,de,tn,dn,kw) OR (('cellularphone* NEAR/2 app*):ti,ab,de,tn,dn,kw) OR (('cellularphone* NEAR/2 software*):ti,ab,de,tn,dn,kw) OR (('cellular telephone* NEAR/2 app*):ti,ab,de,tn,dn,kw) OR (('cellular telephone* NEAR/2 software*):ti,ab,de,tn,dn,kw) OR (('cellulartelephone* NEAR/2 app*):ti,ab,de,tn,dn,kw) OR (('cellulartelephone* NEAR/2 software*):ti,ab,de,tn,dn,kw) OR ((mobile NEAR/2 (app* OR software*)):ti,ab,de,tn,dn,kw) OR 'cell phone*':ti,ab,tn,dn,de,kw OR 'cellphone*':ti,ab,tn,dn,de,kw OR 'cellular phone*':ti,ab,tn,dn,de,kw OR 'cellular telephone*':ti,ab,tn,dn,de,kw OR 'cellularphone*':ti,ab,tn,dn,de,kw OR 'cellulartelephone*':ti,ab,tn,dn,de,kw OR 'mobile phone*':ti,ab,tn,dn,de,kw OR 'mobile telephone*':ti,ab,tn,dn,de,kw OR 'mobiletelephone*':ti,ab,tn,dn,de,kw OR 'smart phone*':ti,ab,tn,dn,de,kw OR 'smartphone*':ti,ab,tn,dn,de,kw) AND ('tachycardia'/exp OR 'catecholaminergic polymorphic ventricular tachycardia'/exp OR 'experimental tachycardia'/exp OR 'isoprenaline-induced tachycardia'/exp OR 'heart ventricle tachycardia'/exp OR 'hyperkinetic heart syndrome'/exp OR 'monomorphic ventricular tachycardia'/exp OR 'pacemaker mediated tachycardia'/exp OR 'paroxysmal tachycardia'/exp OR 'paroxysmal supraventricular tachycardia'/exp OR 'wolff parkinson white syndrome'/exp OR 'polymorphic ventricular tachycardia'/exp OR 'postural orthostatic tachycardia syndrome'/exp OR 'reentry tachycardia'/exp OR 'atrioventricular nodal reentry tachycardia'/exp OR 'sinoatrial nodal reentry tachycardia'/exp OR 'sinus tachycardia'/exp OR 'supraventricular tachycardia'/exp OR 'ectopic atrial tachycardia'/exp OR 'junctional ectopic tachycardia'/exp OR 'tachycardia induced cardiomyopathy'/exp OR 'acute atrial fibrillation':ti,ab,tn,dn,kw,de OR 'acute heart atrium fibrillation':ti,ab,tn,dn,kw,de OR 'atrial fibrillation':ti,ab,tn,dn,kw,de OR 'atrium fibrillation':ti,ab,tn,dn,kw,de OR 'auricular fibrillation':ti,ab,tn,dn,kw,de OR 'auricular fibrillation':ti,ab,tn,dn,kw,de OR 'cardiac atrial fibrillation':ti,ab,tn,dn,kw,de OR 'cardiac atrium fibrillation':ti,ab,tn,dn,kw,de OR 'chronic atrial fibrillation':ti,ab,tn,dn,kw,de OR 'chronic atrium fibrillation':ti,ab,tn,dn,kw,de OR 'experimental atrial fibrillation':ti,ab,tn,dn,kw,de OR 'experimentally induced atrial fibrillation':ti,ab,tn,dn,kw,de OR 'fibrillation, heart atrium':ti,ab,tn,dn,kw,de OR 'heart atrial fibrillation':ti,ab,tn,dn,kw,de OR 'heart atrium fibrillation':ti,ab,tn,dn,kw,de OR 'heart fibrillation atrium':ti,ab,tn,dn,kw,de OR 'new-onset atrial fibrillation':ti,ab,tn,dn,kw,de OR 'nonvalvular atrial fibrillation':ti,ab,tn,dn,kw,de OR 'non-valvular atrial fibrillation':ti,ab,tn,dn,kw,de OR 'paroxysmal atrial fibrillation':ti,ab,tn,dn,kw,de OR 'paroxysmal heart atrium fibrillation':ti,ab,tn,dn,kw,de OR 'permanent atrial fibrillation':ti,ab,tn,dn,kw,de OR 'permanent atrium fibrillation':ti,ab,tn,dn,kw,de OR 'persistent atrial fibrillation':ti,ab,tn,dn,kw,de OR 'persistent atrium fibrillation':ti,ab,tn,dn,kw,de OR 'persistent heart atrium fibrillation':ti,ab,tn,dn,kw,de OR 'recent-onset atrial fibrillation':ti,ab,tn,dn,kw,de OR 'atrial fibrillation'/exp OR 'chronic atrial fibrillation'/exp OR 'experimental atrial fibrillation'/exp OR 'new-onset atrial fibrillation'/exp OR 'paroxysmal atrial fibrillation'/exp OR 'permanent atrial fibrillation'/exp OR 'persistent atrial fibrillation'/exp OR (((atrial* OR atrium* OR auricular*) NEXT/2 fibrillat*):ti,ab,tn,dn,kw,de) OR 'heart atrium flutter'/exp OR 'atrial flutter':ti,ab,tn,dn,kw,de OR 'atrium flutter':ti,ab,tn,dn,kw,de OR 'atrium flutter, heart':ti,ab,tn,dn,kw,de OR 'auricular flutter':ti,ab,tn,dn,kw,de OR 'cardiac atrial flutter':ti,ab,tn,dn,kw,de OR 'cardiac atrium flutter':ti,ab,tn,dn,kw,de OR 'flutter, heart atrium':ti,ab,tn,dn,kw,de OR 'heart atrial flutter':ti,ab,tn,dn,kw,de OR 'heart atrium flutter':ti,ab,tn,dn,kw,de OR 'supraventricular flutter':ti,ab,tn,dn,kw,de OR (((atrial* OR atrium* OR auricular*) NEXT/2 flutter*):ti,ab,tn,dn,kw,de) OR 'heart ventricle flutter'/exp OR 'flutter, heart ventricle':ti,ab,tn,dn,kw,de OR 'heart ventricle flutter':ti,ab,tn,dn,kw,de OR 'ventricular flutter':ti,ab,tn,dn,kw,de OR ((ventri* NEXT/2 flutter*):ti,ab,tn,dn,kw,de) OR 'heart ventricle fibrillation'/exp OR 'cardiac ventricle fibrillation':ti,ab,tn,dn,kw,de OR 'cardiac ventricular fibrillation':ti,ab,tn,dn,kw,de OR 'fibrillation, heart ventricle':ti,ab,tn,dn,kw,de OR 'heart ventricle fibrillation':ti,ab,tn,dn,kw,de OR 'heart ventricular | 781  |

|                                                                                                                                                                                                                                                                                                                                                                                                                                                                                                                                                                                                                                                                                                                                                                                                                                                                                                                                                                                                                                                                                                                                                                                                                                                                                                                                                                                                                                                                                                                                                                                                                                                                                                                                          |  |
|------------------------------------------------------------------------------------------------------------------------------------------------------------------------------------------------------------------------------------------------------------------------------------------------------------------------------------------------------------------------------------------------------------------------------------------------------------------------------------------------------------------------------------------------------------------------------------------------------------------------------------------------------------------------------------------------------------------------------------------------------------------------------------------------------------------------------------------------------------------------------------------------------------------------------------------------------------------------------------------------------------------------------------------------------------------------------------------------------------------------------------------------------------------------------------------------------------------------------------------------------------------------------------------------------------------------------------------------------------------------------------------------------------------------------------------------------------------------------------------------------------------------------------------------------------------------------------------------------------------------------------------------------------------------------------------------------------------------------------------|--|
| <p>fibrillation':ti,ab,tn,dn,kw,de OR 'ventricle fibrillation':ti,ab,tn,dn,kw,de OR 'ventricle fibrillation, heart':ti,ab,tn,dn,kw,de OR 'ventricular fibrillation':ti,ab,tn,dn,kw,de OR 'experimental ventricular fibrillation/exp OR 'experimental ventricular fibrillation':ti,ab,tn,dn,kw,de OR 'experimentally induced ventricular vibrillation':ti,ab,tn,dn,kw,de OR 'electrically induced ventricular fibrillation'/exp OR 'electrically induced ventricular fibrillation':ti,ab,tn,dn,kw,de OR ((ventri* NEXT/2 fibrill*):ti,ab,tn,dn,kw,de) OR 'heart beat'/exp OR 'beat, heart':ti,ab,tn,dn,kw,de OR 'cardiac beat':ti,ab,tn,dn,kw,de OR 'heart beat':ti,ab,tn,dn,kw,de OR 'diastole'/exp OR 'cardiac diastole':ti,ab,tn,dn,kw,de OR 'diastole':ti,ab,tn,dn,kw,de OR 'diastolic force':ti,ab,tn,dn,kw,de OR 'heart diastole':ti,ab,tn,dn,kw,de OR 'extrasystole'/exp OR 'beat, ectopic':ti,ab,tn,dn,kw,de OR 'cardiac complexes, premature':ti,ab,tn,dn,kw,de OR 'ectopic beat':ti,ab,tn,dn,kw,de OR 'extrasystole':ti,ab,tn,dn,kw,de OR 'extrasystolic beat':ti,ab,tn,dn,kw,de OR 'heart extrasystole':ti,ab,tn,dn,kw,de OR 'heart premature beat':ti,ab,tn,dn,kw,de OR 'nodal extrasystole':ti,ab,tn,dn,kw,de OR 'premature beat':ti,ab,tn,dn,kw,de OR 'systole'/exp OR 'heart systole':ti,ab,tn,dn,kw,de OR 'systole':ti,ab,tn,dn,kw,de OR 'systolic index':ti,ab,tn,dn,kw,de OR 'systolic phase':ti,ab,tn,dn,kw,de OR ((heart NEXT/3 beat):ti,ab,tn,dn,kw,de) OR ((irregular* NEAR/3 (puls* OR heart* OR rhythm*)):ti,ab,tn,dn,kw,de) OR (((atypical* OR unexpect* OR unsuspect* OR unforeseeabl* OR abnormal* OR uneven* OR fitful* OR erratic* OR sporadi*) NEAR/3 (puls* OR heart* OR rhythm*)):ti,ab,de,tn,dn,kw))</p> |  |
|------------------------------------------------------------------------------------------------------------------------------------------------------------------------------------------------------------------------------------------------------------------------------------------------------------------------------------------------------------------------------------------------------------------------------------------------------------------------------------------------------------------------------------------------------------------------------------------------------------------------------------------------------------------------------------------------------------------------------------------------------------------------------------------------------------------------------------------------------------------------------------------------------------------------------------------------------------------------------------------------------------------------------------------------------------------------------------------------------------------------------------------------------------------------------------------------------------------------------------------------------------------------------------------------------------------------------------------------------------------------------------------------------------------------------------------------------------------------------------------------------------------------------------------------------------------------------------------------------------------------------------------------------------------------------------------------------------------------------------------|--|

**Table S2: Search strategy for Cochrane database**

| ID  | Search                                                                                                                                                 | Hits  |
|-----|--------------------------------------------------------------------------------------------------------------------------------------------------------|-------|
| #1  | MeSH descriptor: [Atrial Fibrillation] explode all trees                                                                                               | 4665  |
| #2  | (atrial* near/2 fibrillation*):ti,ab,kw                                                                                                                | 12671 |
| #3  | #1 OR #2                                                                                                                                               | 12671 |
| #4  | MeSH descriptor: [Atrial Flutter] explode all trees                                                                                                    | 375   |
| #5  | (atrial* near/2 flutter*):ti,ab,kw                                                                                                                     | 978   |
| #6  | #4 OR #5                                                                                                                                               | 978   |
| #7  | MeSH descriptor: [Ventricular Fibrillation] explode all trees                                                                                          | 544   |
| #8  | (ventri* near/2 fibrillat*):ti,ab,kw                                                                                                                   | 1713  |
| #9  | #7 OR #8                                                                                                                                               | 1713  |
| #10 | MeSH descriptor: [Tachycardia] explode all trees                                                                                                       | 1799  |
| #11 | tachycardi* :ti,ab,kw                                                                                                                                  | 8496  |
| #12 | #10 OR #11                                                                                                                                             | 8525  |
| #13 | MeSH descriptor: [Heart Rate] explode all trees                                                                                                        | 19310 |
| #14 | (heart rate):ti,ab,kw                                                                                                                                  | 75355 |
| #15 | #13 OR #14                                                                                                                                             | 75360 |
| #16 | (Irregular* or unpredictable* or atypical*) near/3 (puls* or heart* or rhythm*)                                                                        | 244   |
| #17 | (atypical* or unexpect* or unsuspect* or unforeseeabl* or abnormal* or uneven* or fitful* or erratic* or sporadi*) near/3 (puls* or heart* or rhythm*) | 946   |
| #18 | #16 OR #17                                                                                                                                             | 1157  |
| #19 | ((smart* near/2 phone*) or (mobil* near/2 phone*) or mobilphone* or cellphone* or (cell near/2 phone*) or mobilephone or mobile app*):ti,ab,kw         | 8221  |
| #20 | MeSH descriptor: [Mobile Applications] explode all trees                                                                                               | 660   |
| #21 | MeSH descriptor: [Smartphone] explode all trees                                                                                                        | 407   |
| #22 | MeSH descriptor: [Cell Phone] explode all trees                                                                                                        | 1373  |
| #23 | #19 OR #20 OR #21 OR #22                                                                                                                               | 8851  |
| #24 | MeSH descriptor: [Ventricular Flutter] explode all trees                                                                                               | 2     |
| #25 | (ventri* near/2 flutter*):ti,ab,kw                                                                                                                     | 28    |
| #26 | #24 OR #25                                                                                                                                             | 28    |
| #27 | #3 OR #6 OR #9 OR #12 OR #15 OR #18 OR #26                                                                                                             | 90651 |
| #28 | #23 AND #27 in Trials                                                                                                                                  | 370   |

**Table S3: Summary of characteristics for conference abstracts**

| Study                       | Study design and key enrolment criteria                              | Setting and sample size                      | Population characteristics                                                                                          | Technology for AF detection                                                                                                                                                      | Reference test  |
|-----------------------------|----------------------------------------------------------------------|----------------------------------------------|---------------------------------------------------------------------------------------------------------------------|----------------------------------------------------------------------------------------------------------------------------------------------------------------------------------|-----------------|
| Grieten 2018-1 <sup>1</sup> | Prospective multi-centre<br>Age>65 years                             | Primary care<br>N=242<br>AF prevalence 38%   | Age 77 years (mean);<br>Female 57%;<br>hypertension 84%;<br>diabetes 22%; stroke 23%; heart failure 29%;<br>OAC 55% | Unspecified smartphone; Fibrichck PPG app and algorithm                                                                                                                          | Single lead ECG |
| Grieten 2018-2 <sup>2</sup> | Prospective, multi-centre                                            | Primary care<br>N=1056<br>AF prevalence 0.8% | Age 59 years (mean);<br>Female 59%                                                                                  | Unspecified smartphone; Fibrichck PPG app and algorithm                                                                                                                          | Single lead ECG |
| Karim 2017 <sup>3</sup>     | Prospective, single centre<br>Sinus arrhythmia and ectopics excluded | Secondary care<br>N=140<br>AF prevalence 50% |                                                                                                                     | Unspecified smartphone; PPG Preventicus app and algorithm                                                                                                                        | 12-lead ECG     |
| Kuan 2018 <sup>4</sup>      | Prospective, single centre                                           | Secondary care<br>N=194<br>AF prevalence 35% | Age 70 years (mean);<br>Female 27%                                                                                  | iPhone; CRMA app 3 X 20 second recordings, AF labelled if pulse irregularity found in $\geq 1$ PPG readings or 3 uninterpretable readings                                        | 12 lead ECG     |
| Maitas 2012-1 <sup>5</sup>  | Prospective, single centre<br>AF for DCCV                            | Secondary care<br>N=52<br>AF prevalence 100% |                                                                                                                     | iPhone 4S; unknown PPG app, 120 second recordings, analysed using 2 statistical techniques (RMSSD, Shannon entropy) to examine heart beat intervals and beat-to-beat variability | 12-lead ECG     |
| Maitas 2012-2 <sup>6</sup>  | Prospective, single centre<br>AF for DCCV                            | Secondary care<br>N=33<br>AF prevalence 100% |                                                                                                                     | iPhone 4S; unknown PPG app, 120-300 second recordings, analysed using 3 statistical techniques (RMSSD, ShE and Sample entropy)                                                   | 12-lead ECG     |

|                                |                                                                                  |                                                        |                                     |                                                                                                                                                  |                                                                                         |
|--------------------------------|----------------------------------------------------------------------------------|--------------------------------------------------------|-------------------------------------|--------------------------------------------------------------------------------------------------------------------------------------------------|-----------------------------------------------------------------------------------------|
| Mortelmans 2017 <sup>7</sup>   | Prospective, single centre<br>Majority with history of AF                        | Primary care<br>N=242<br>AF prevalence 66%             |                                     | Unspecified smartphone; Fibrichk PPG app, 60 second recording                                                                                    | Single lead ECG                                                                         |
| Mutke 2019 <sup>8</sup>        | Retrospective analysis of data from 2 prospective multi-centre validation trials | Unclear<br>N=1096<br>AF prevalence 44%                 |                                     | Unspecified smartphone and PPG app; 60 second recording automated signal quality check and categorized into AF or SR using unspecified algorithm | Blinded interpretation of single lead ECG by cardiologists                              |
| Napolitano 2015 <sup>9</sup>   | Retrospective analysis of pulse recordings from patients who underwent DCCV      | Data from secondary care<br>N=121<br>AF prevalence 81% |                                     | iPhone 4S; PULSESMART app, 120 second recording analysed using 3 statistical techniques RMSSD; ShE; Poincare plot                                | 12 or 3 lead ECG                                                                        |
| Proesmans 2019-2 <sup>10</sup> | Prospective, single centre<br>AF for DCCV and in-patients with AF                | Secondary care<br>N=164<br>AF prevalence 37%           | Age 64 years (mean);<br>Females 42% | 7 iOS and 7 android smartphones; unknown PPG app                                                                                                 | 12 lead ECG                                                                             |
| Proesmans. 2018 <sup>11</sup>  | Prospective, 2 centre<br>Age over 40 years                                       | Primary care<br>N=1095<br>AF prevalence 0.5%           |                                     | Unknown smartphone and PPG app; automatic algorithm and visual interpretation                                                                    | Single lead ECG                                                                         |
| Rozen 2017 <sup>12</sup>       | Prospective, single centre<br>AF undergoing DCCV                                 | Secondary care<br>N=113<br>AF prevalence 100%          | 68 years (mean); Female 23%         | iPhone; CRMA PPG app, 6 recordings analysed by algorithm 2 out of 3 irregular recordings needed to label AF                                      | Blinded 12 lead ECG or single lead ECG (rhythm strip) interpretation by 2 cardiologists |
| Siu 2016 <sup>13</sup>         | Prospective, single centre<br>Either >65 years, DM, or hypertension              | Primary care<br>N= 1027<br>AF prevalence 3%            | Age 68 years (mean)                 | Unspecified smartphone; CRMA PPG app                                                                                                             | Single lead ECG interpretation by 2 cardiologists                                       |

|                                 |                                                                                              |                                              |                                      |                                                                                                              |                                                                                         |
|---------------------------------|----------------------------------------------------------------------------------------------|----------------------------------------------|--------------------------------------|--------------------------------------------------------------------------------------------------------------|-----------------------------------------------------------------------------------------|
| Smeets 2019 <sup>14</sup>       | Prospective single centre<br>AF scheduled for DCCV/ablation & those on continuous monitoring | Secondary care<br>N=150<br>AF prevalence 37% | 64 years (mean);<br>Females 42% (AF) | 6 Android and 2 iOS smartphones; unknown PPG app; 1 recording per device                                     | 12-lead ECG                                                                             |
| Vaid 2015 <sup>15</sup>         | Prospective single centre<br>AF undergoing DCCV                                              | Secondary care<br>N= 37<br>AF prevalence 78% | 69 years (median);<br>Female 19%     | iPhone; CRMA PPG, 6 recordings analysed by CRMA algorithm 2 out of 3 irregular recordings needed to label AF | Blinded 12 lead ECG or single lead ECG (rhythm strip) interpretation by 2 cardiologists |
| Vandenberk 2018-1 <sup>16</sup> | Prospective single centre<br>History of AF                                                   | Unclear<br>N=344<br>AF prevalence 50%        |                                      | Unspecified smartphone, Fibricheck PPG app, analysed by 2 blinded cardiologists                              | Blinded 12 lead ECG analysis by 2 cardiologists                                         |
| Vandenberk 2018-2 <sup>17</sup> | Prospective single centre<br>History of AF                                                   | Unclear<br>N= 322<br>AF prevalence 55%       |                                      | Unspecified smartphone and PPG app, 60 second recording analysed by clinicians                               | Blinded single lead ECG interpretation by 2 cardiologists                               |
| Yan 2016 <sup>18</sup>          | Prospective single centre                                                                    | Secondary<br>N=85<br>AF prevalence 29%       | Age 72 years (mean);<br>Female 33%   | iPhone 6s, CRMA PPG app, 3 X 20 second recordings, irregularity in 1 or more recordings needed to label AF   | 12 lead ECG                                                                             |

**Table S4: Risk of bias and applicability concerns for full text studies**

| Study author and year          | QUADAS 2-Risk of Bias |                 |                         |                 | QUADAS 2-Applicability concerns |                 |                         |                        |
|--------------------------------|-----------------------|-----------------|-------------------------|-----------------|---------------------------------|-----------------|-------------------------|------------------------|
|                                | Patient selection     | Index test: PPG | Reference standard: ECG | Flow and timing | Patient Selection               | Index test: PPG | Reference standard: ECG | Domains with high risk |
| Brasier 2019 <sup>19</sup>     | High risk             | Unclear         | Low risk                | High risk       | Low risk                        | Low risk        | Low risk                | 2/7                    |
| Chan 2016 <sup>20</sup>        | Unclear               | Low risk        | Low risk                | High risk       | Low risk                        | Low risk        | Low risk                | 1/7                    |
| Fan 2019 <sup>21</sup>         | High risk             | Unclear         | Low risk                | High risk       | Low risk                        | Low risk        | Low risk                | 2/7                    |
| McManus 2016 <sup>22</sup>     | High risk             | Low risk        | Unclear                 | High risk       | Low risk                        | Low risk        | Low risk                | 2/7                    |
| McManus 2013 <sup>23</sup>     | High risk             | High risk       | Unclear                 | Low risk        | Low risk                        | Low risk        | Low risk                | 2/7                    |
| Mutke 2020 <sup>24</sup>       | High risk             | Low risk        | Low risk                | High risk       | Low risk                        | Low risk        | Low risk                | 2/7                    |
| Poh 2018 <sup>25</sup>         | Unclear               | Low risk        | High risk               | High risk       | Unclear                         | Low risk        | Low risk                | 2/7                    |
| Proesmans 2019-1 <sup>26</sup> | High risk             | Unclear         | Low risk                | High risk       | Low risk                        | Low risk        | Low risk                | 2/7                    |
| Rozen 2018 <sup>27</sup>       | High risk             | Low risk        | Low risk                | High risk       | Low risk                        | Low risk        | Low risk                | 2/7                    |
| Yan 2018 <sup>28</sup>         | High risk             | Low risk        | Low risk                | High risk       | Low risk                        | Low risk        | Low risk                | 2/7                    |



**Table S5: Risk of bias and applicability concerns for conference abstracts**

| Study author and year           | QUADAS 2-Risk of Bias |                 |                         |                 | QUADAS 2-Applicability concerns |                 |                         |                        |
|---------------------------------|-----------------------|-----------------|-------------------------|-----------------|---------------------------------|-----------------|-------------------------|------------------------|
|                                 | Patient selection     | Index test: PPG | Reference standard: ECG | Flow and timing | Patient Selection               | Index test: PPG | Reference standard: ECG | Domains with high risk |
| Grieten 2018-1 <sup>1</sup>     | High risk             | Unclear         | Low risk                | High risk       | Low risk                        | Low risk        | Low risk                | 2/7                    |
| Grieten 2018-2 <sup>2</sup>     | High risk             | Unclear         | High risk               | High risk       | Low risk                        | Low risk        | Low risk                | 3/7                    |
| Karim 2017 <sup>3</sup>         | High risk             | Unclear         | Unclear                 | Unclear         | Low risk                        | Low risk        | Low risk                | 1/7                    |
| Kuan 2018 <sup>4</sup>          | Unclear               | Unclear         | Unclear                 | Unclear         | Unclear                         | Low risk        | Low risk                | 0/7                    |
| Maitas 2012-1 <sup>5</sup>      | High risk             | Unclear         | Unclear                 | Unclear         | Low risk                        | Low risk        | Low risk                | 1/7                    |
| Maitas 2012-2 <sup>6</sup>      | High risk             | Unclear         | Unclear                 | Unclear         | Low risk                        | Low risk        | Low risk                | 1/7                    |
| Mortelmans 2017 <sup>7</sup>    | High risk             | Unclear         | High risk               | High risk       | Low risk                        | Low risk        | Low risk                | 3/7                    |
| Mutke 2019 <sup>8</sup>         | Unclear               | Unclear         | Low risk                | Low risk        | Low risk                        | Low risk        | Low risk                | 0/7                    |
| Napolitano 2015 <sup>9</sup>    | High risk             | Unclear         | Unclear                 | High risk       | Low risk                        | Low risk        | Low risk                | 2/7                    |
| Proesmans 2019-2 <sup>10</sup>  | Unclear               | Unclear         | High risk               | Unclear         | Unclear                         | Low risk        | Low risk                | 1/7                    |
| Proesmans 2018 <sup>11</sup>    | High risk             | Unclear         | Unclear                 | High risk       | Low risk                        | Low risk        | Low risk                | 2/7                    |
| Rozen 2017 <sup>12</sup>        | High risk             | Low risk        | Low risk                | High risk       | Low risk                        | Low risk        | Low risk                | 2/7                    |
| Siu 2016 <sup>13</sup>          | Unclear               | Unclear         | Unclear                 | Unclear         | Low risk                        | Low risk        | Low risk                | 0/7                    |
| Smeets. 2019 <sup>14</sup>      | Unclear               | Unclear         | Unclear                 | High risk       | Low risk                        | Low risk        | Low risk                | 1/7                    |
| Vaid 2015 <sup>15</sup>         | High risk             | Low risk        | Low risk                | High risk       | Low risk                        | Low risk        | Low risk                | 2/7                    |
| Vandenberk 2018-1 <sup>16</sup> | High risk             | Unclear         | Unclear                 | Unclear         | Low risk                        | Low risk        | Low risk                | 1/7                    |
| Vandenberk 2018-2 <sup>17</sup> | Unclear               | Unclear         | Low risk                | Unclear         | Low risk                        | Low risk        | Low risk                | 0/7                    |
| Yan 2016 <sup>18</sup>          | Unclear               | Low risk        | Unclear                 | Unclear         | Low risk                        | Low risk        | Low risk                | 0/7                    |

**Table S6: Sensitivity and specificity of each study by smartphone PPG application**

| Application   | Study                           | Sensitivity %<br>(95% CI) | Specificity<br>(95% CI) |
|---------------|---------------------------------|---------------------------|-------------------------|
| Cardio Rhythm | Chan 2016 <sup>20</sup>         | 93 (77-99)                | 98 (97-99)              |
|               | Rozen 2018 <sup>27</sup>        | 93 (87-97)                | 91 (83– 96)             |
|               | Yan 2018a <sup>28</sup>         | 95 (87-98)                | 96 (91-98)              |
|               | Yan 2018b <sup>28</sup>         | 95 (87-98)                | 93 (88-96)              |
|               | Kuan 2018 <sup>4</sup>          | 100 (83-100)              | 95 (84-99)              |
|               | Rozen 2017 <sup>12</sup>        | 96 (90-99)                | 93 (87-97)              |
|               | Siu 2016 <sup>13</sup>          | 93                        | 98                      |
|               | Vaid 2015 <sup>15</sup>         | 97 (82-100)               | 85 (69-94)              |
|               | Yan 2016 <sup>18</sup>          | 93 (77-98)                | 95 (86-98)              |
| Preventicus   | Brasier 2019a <sup>19</sup>     | 90 (86-93)                | 99 (98-100)             |
|               | Brasier 2019b <sup>19</sup>     | 91 (87-95)                | 99 (97-100)             |
|               | Brasier 2019c <sup>19</sup>     | 92 (86-95)                | 100 (98-100)            |
|               | Fan 2019 <sup>21</sup>          | 95 (92-97)                | 100 (98-100)            |
|               | Karim 2017 <sup>3</sup>         | 94 (85-98)                | 96 (87-99)              |
|               | Mutke 2020 <sup>24</sup>        | 92 (89-94)                | 98 (97-99)              |
| Fibricheck    | Proesmans 2019-1 <sup>26</sup>  | 96 (89-99)                | 97 (91-99)              |
|               | Grieten 2018-1 <sup>1</sup>     | 98 (92-100)               | 88 (80-94)              |
|               | Grieten 2018-2 <sup>2</sup>     | 100                       | 97                      |
|               | Mortelmans 2017 <sup>7</sup>    | 98 (92-100)               | 88 (80-94)              |
|               | Vandenberk 2018-1 <sup>16</sup> | 97                        | 99                      |
| PULSE-SMART   | McManus 2016 <sup>22</sup>      | 97                        | 94                      |
|               | Napolitano 2015 <sup>9</sup>    | 97                        | 94                      |

**Figure S1: Forest plot of the sensitivity and specificity of smartphone PPG vs ECG**

Horizontal lines represent the 95% confidence interval (where available) for each comparison.

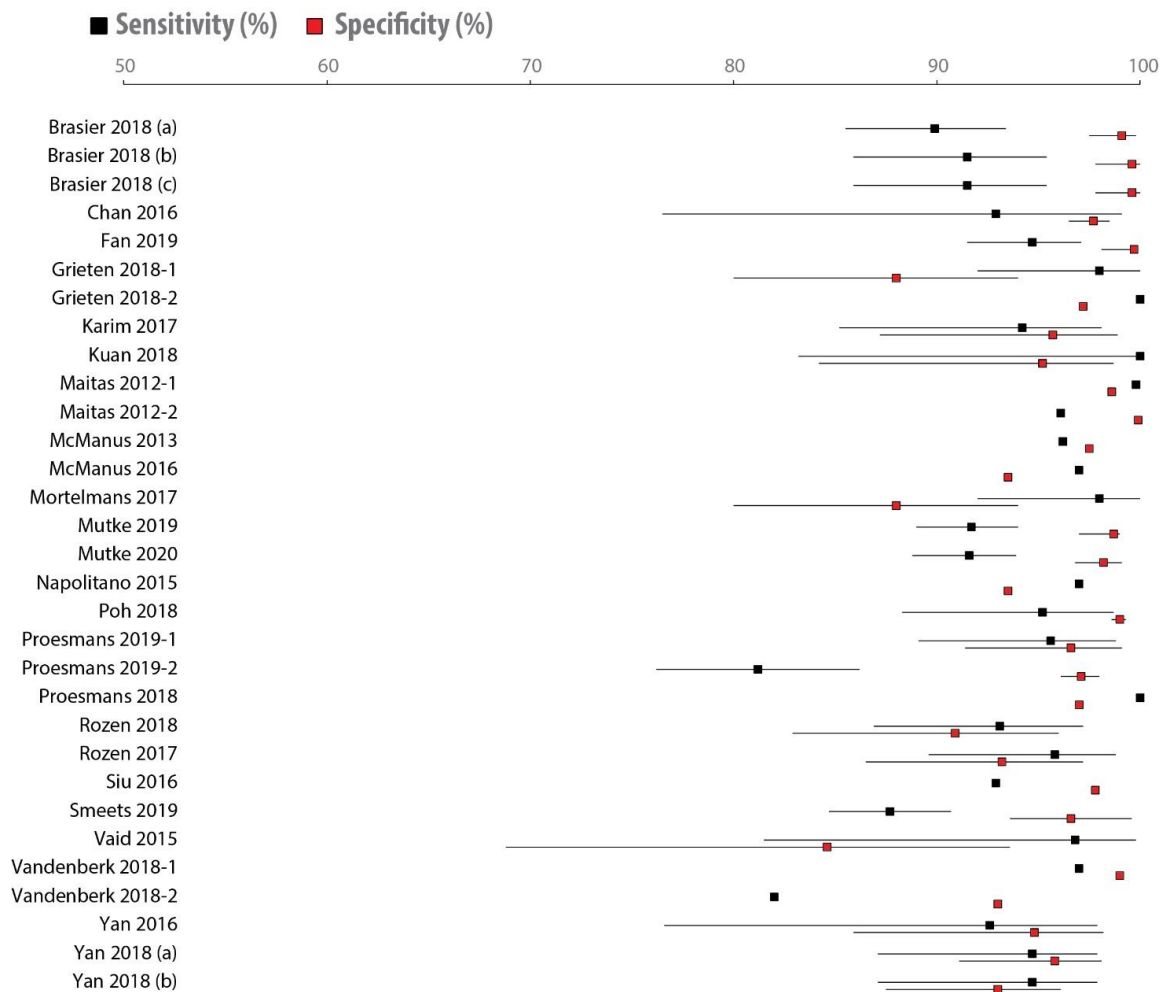

**Figure S2: Forest plot of positive/negative prediction for smartphone PPG vs ECG**

Horizontal lines represent the 95% confidence interval (where available) for each comparison

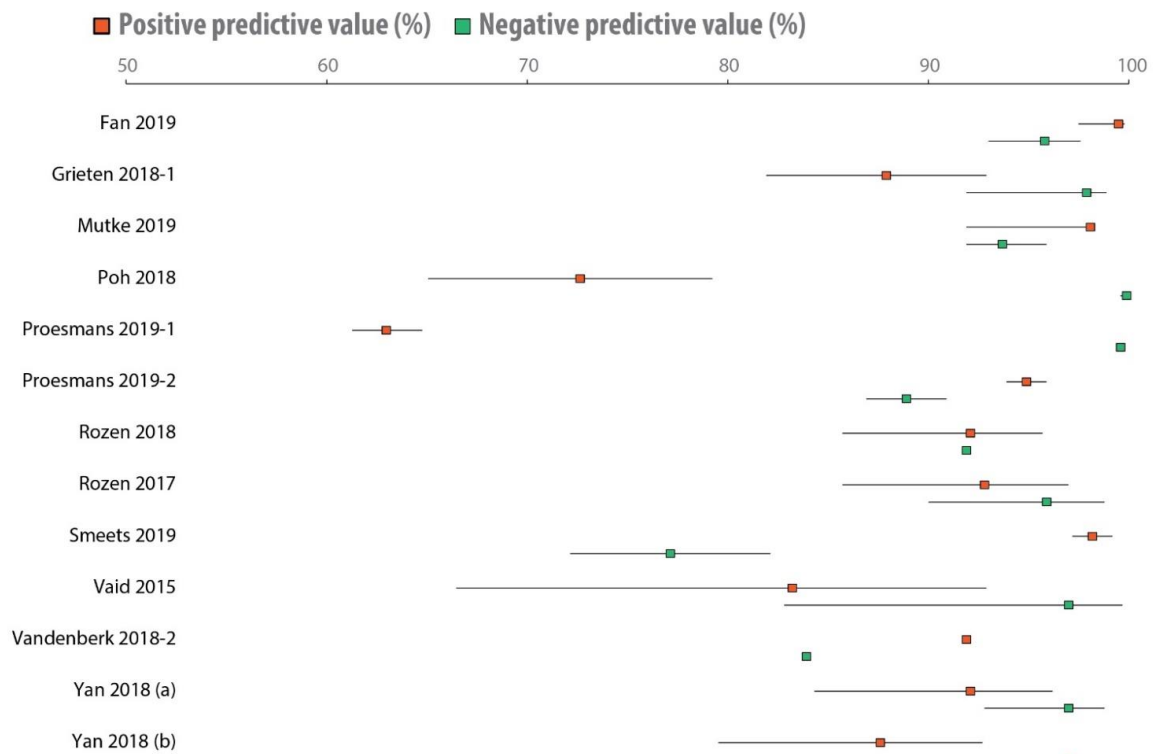

## References

1. Grieten L, Haelst RV, Mortelmans C, *et al.* The diagnostic accuracy of smartphone applications to detect atrial fibrillation: A head-to-head comparison between fibrichck and alivecor. *Heart Rhythm.* 2018;15:S71
2. Grieten L, Van Der Auwera J, Vandervoort P, *et al.* Using smartphone enabled technologies for detection atrial fibrillation: Is there a difference in signal quality between ECG and PPG? *Heart Rhythm.* 2018;15:S70-S71
3. Karim N, Aral M, Eduawor S, *et al.* AF detection using smartphone apps. *Europace.* 2017;19:iii234
4. Kuan DJ, Chung HJ, Lai WH, *et al.* A novel strategy combining hand-held ECG and contact-free facial pulsatile photoplethysmographic detection for atrial fibrillation screening. *Heart Rhythm.* 2018;15:S88-S89
5. Maitas O, Lee J, Robotis D, *et al.* Detection of atrial fibrillation using an iphone 4S. *Circulation.* 2012;126
6. Maitas O, Lee J, Robotis D, *et al.* Detection of atrial fibrillation using a smartphone camera. *Circ Res.* 2012;111
7. Mortelmans C, Van Haelst R, Van Der Auwera J, *et al.* Validation of a new smartphone application for the diagnosis of atrial fibrillation in primary care. *Europace.* 2017;19:iii16
8. Mutke MR, Hoelz B, Brasier N, *et al.* Non-invasive rhythm diagnostics: bringing old and new together. *Europace.* 2019;21:779-787
9. Napolitano CA, Chong JW, Saczynski JS, *et al.* Pulse-based arrhythmia discrimination using a novel smartphone application. *Circulation.* 2015;132
10. Proesmans T, Smeets C, Dreesen P, *et al.* Preliminary results of the FLASH-AF: Validation of the device independent nature of a pulse deriving smartphone application for the detection of atrial fibrillation. *Eur Heart J.* 2019;40:765
11. Proesmans T, Vandenberk T, Vandervoort P, *et al.* Evaluation of screening technologies and assessments in a voluntary screening programme in the general belgian population. *Eur Heart J.* 2018;39:1290-1291
12. Rozen G, Vaid J, Hosseini SM, *et al.* Diagnostic accuracy of a novel mobile phone application in monitoring atrial fibrillation. *Eur Heart J.* 2017;38:451-452
13. Siu D, Wong CK, Chan PH, *et al.* Head-to-head comparison of a camera-based smartphone application cardiio rhythmmtm with alivecor® heart monitor for atrial fibrillation screening in primary healthcare setting. *J Am Coll Cardiol.* 2016;67:696
14. Smeets C, Houben E, Vranken J, *et al.* The diagnostic accuracy of a pulse-deriving smartphone application is device independent. *Europace.* 2019;21:1024-1029
15. Vaid J, Poh MZ, Saleh A, *et al.* Diagnostic accuracy of a novel mobile application (cardiio rhythm) for detecting atrial fibrillation. *J Am Coll Cardiol.* 2015;65:A361
16. Vandenberk T, Mortelmans C, Van Haelst R, *et al.* Diagnosis of atrial fibrillation based on a PPG signal compared to one lead ecg. *Heart Rhythm.* 2018;15:S505
17. Vandenberk T, Pelckmans C, Mortelmans C, *et al.* Atrial fibrillation diagnosis based on a smartphone derived PPG waveform: A diagnostic accuracy study versus singlelead. *Circulation.* 2018;138
18. Yan BP, Chan S, Lai WH, *et al.* Validation of a novel contact-free atrial fibrillation screening method using an iPhone camera to detect facial pulsatile photoplethysmographic signals. *Circulation.* 2016;134

19. Brasier N, Raichle CJ, Dorr M, *et al.* Detection of atrial fibrillation with a smartphone camera: first prospective, international, two-centre, clinical validation study (DETECT AF PRO). *Europace*. 2019;21:41-47
20. Chan PH, Wong CK, Poh YC, *et al.* Diagnostic Performance of a Smartphone-Based Photoplethysmographic Application for Atrial Fibrillation Screening in a Primary Care Setting. *J Am Heart Assoc*. 2016;5
21. Fan YY, Li YG, Li J, *et al.* Diagnostic Performance of a Smart Device With Photoplethysmography Technology for Atrial Fibrillation Detection: Pilot Study (Pre-mAFA II Registry). *JMIR Mhealth Uhealth*. 2019;7:e11437
22. Mc MD, Chong JW, Soni A, *et al.* PULSE-SMART: Pulse-Based Arrhythmia Discrimination Using a Novel Smartphone Application. *J Cardiovasc Electrophysiol*. 2016;27:51-57
23. McManus DD, Lee J, Maitas O, *et al.* A novel application for the detection of an irregular pulse using an iPhone 4S in patients with atrial fibrillation. *Heart Rhythm*. 2013;10:315-319
24. Mutke MR, Brasier N, Raichle C, *et al.* Comparison and Combination of Single-Lead ECG and Photoplethysmography Algorithms for Wearable-Based Atrial Fibrillation Screening. *Telemed J E Health*. 2021;27:296-302
25. Poh MZ, Poh YC, Chan PH, *et al.* Diagnostic assessment of a deep learning system for detecting atrial fibrillation in pulse waveforms. *Heart*. 2018;104:1921-1928
26. Proesmans T, Mortelmans C, Van Haelst R, *et al.* Mobile Phone-Based Use of the Photoplethysmography Technique to Detect Atrial Fibrillation in Primary Care: Diagnostic Accuracy Study of the FibriCheck App. *JMIR Mhealth Uhealth*. 2019;7:e12284
27. Rozen G, Vaid J, Hosseini SM, *et al.* Diagnostic Accuracy of a Novel Mobile Phone Application for the Detection and Monitoring of Atrial Fibrillation. *Am J Cardiol*. 2018;121:1187-1191
28. Yan BP, Lai WHS, Chan CKY, *et al.* Contact-Free Screening of Atrial Fibrillation by a Smartphone Using Facial Pulsatile Photoplethysmographic Signals. *J Am Heart Assoc*. 2018;7
